# Supplementary material for: Synthesis and biological evaluation of novel 2,3-pyrazole ring-substituted-4,4-dimethyl lithocholic acid derivatives as selective protein tyrosine phosphatase 1B (PTP1B) inhibitors with cellular efficacy
Source: Royal Society of Chemistry journal article supplement (doi:10.1039/c5ra20238h), 2015-01-01
Supplement: c5ra20238h1.pdf [file c5ra20238h1.pdf]

## Supporting Information for

### ***Synthesis and biological evaluation of novel 2,3-pyrazole ring-substituted-4,4-dimethyl lithocholic acid derivatives as selective protein tyrosine phosphatase 1B (PTP1B) inhibitors with cellular efficacy***

Shi-Wei Mao <sup>a,✉</sup>, Lin Shuai <sup>b,✉</sup>, Hai-Bing He <sup>c,✉</sup>, Na Pan <sup>a</sup>, Li-Xin Gao <sup>b</sup>, Li-Fang Yu <sup>a</sup>, Jia Li <sup>b</sup>, Jing-Ya Li <sup>b,\*</sup>, Fan Yang <sup>a,\*</sup>

<sup>a</sup>*MTDD, School of Chemistry and Molecular Engineering, East China Normal University, Shanghai 200062, China*

<sup>b</sup>*National Center for Drug Screening, Shanghai Institute of Materia Medica, Chinese Academy of Science, Shanghai 201203, China*

<sup>c</sup>*Chemistry and Chemical Engineering, Nantong University, Jiangsu 226019, China*

#### **Contents:**

|                                                                 |          |
|-----------------------------------------------------------------|----------|
| [1] Spectra of <sup>1</sup> H NMR, <sup>13</sup> C NMR and HRMS | -----S2  |
| [2] Crystal data of compound <b>33</b>                          | -----S18 |

---

\* Corresponding author. Tel.: +86 21 62232764; fax: +86 21 62232100 (F. Yang); +86 21 50801313ext132; fax: +86 21 50801552 (J.-Y. Li);

E-mail address: [fyang@chem.ecnu.edu.cn](mailto:fyang@chem.ecnu.edu.cn) (F. Yang); [jyli@mail.shcnc.ac.cn](mailto:jyli@mail.shcnc.ac.cn) (J.-Y. Li)

<sup>✉</sup> These authors contributed equally to this work.





Fig S3: HMBC spectrum of compound **25a** (in the solvent of in the solvent of  $\text{CDCl}_3/\text{CD}_3\text{OD}=2/1$ , v/v)



Fig S4:  $^1\text{H}$  NMR of compound **25b** (in the solvent of  $\text{DMSO-d}_6$ , 400MHz)



Fig S5:  $^{13}\text{C}$  NMR of compound **25b** (in the solvent of  $\text{CDCl}_3/\text{CD}_3\text{OD}=2/1$ , v/v, 101MHz)



Fig S6: HMBC spectrum of compound **25b** (in the solvent of in the solvent of  $\text{CDCl}_3/\text{CD}_3\text{OD}=2/1$ , v/v)



Fig S7: <sup>1</sup>H NMR of compound 26 (in the solvent of DMSO-d<sub>6</sub>, 400MHz)



Fig S8: <sup>13</sup>C NMR of compound 26 (in the solvent of CDCl<sub>3</sub>/CD<sub>3</sub>OD=2/1, v/v, 101MHz)



Fig S9: <sup>1</sup>H NMR of compound 27 (in the solvent of DMSO-d<sub>6</sub>, 400MHz)



Fig S10: <sup>13</sup>C NMR of compound 27 (in the solvent of CDCl<sub>3</sub>/CD<sub>3</sub>OD=2/1, v/v, 101MHz)



Fig S11: <sup>1</sup>H NMR of compound **28** (in the solvent of DMSO-d<sub>6</sub>, 400MHz)



Fig S12: <sup>13</sup>C NMR of compound **28** (in the solvent of CDCl<sub>3</sub>/CD<sub>3</sub>OD=2/1, v/v, 101MHz)



Fig S13: <sup>1</sup>H NMR of compound 29 (in the solvent of DMSO-d<sub>6</sub>, 400MHz)



Fig S14: <sup>13</sup>C NMR of compound 29 (in the solvent of CDCl<sub>3</sub>/CD<sub>3</sub>OD=2/1, v/v, 101MHz)



Fig S15: <sup>1</sup>H NMR of compound **30** (in the solvent of DMSO-d<sub>6</sub>, 400MHz)



Fig S16: <sup>13</sup>C NMR of compound **30** (in the solvent of CDCl<sub>3</sub>/CD<sub>3</sub>OD=2/1, v/v, 101MHz)

## Mass Spectrum SmartFormula Report

**Analysis Info**

Analysis Name D:\Data\TJ&YF-20131111\MSW-159\_23\_01\_2615.d  
 Method tune\_wide\_for\_lc-15min-seg.m  
 Sample Name MSW-159  
 Comment

Acquisition Date 11/11/2013 12:18:05 PM

Operator and analyser ECNU.CHEM. G.D. Yang  
 Instrument / Ser# micrOTOF 10293

**Acquisition Parameter**

|             |          |                      |          |                  |           |
|-------------|----------|----------------------|----------|------------------|-----------|
| Source Type | ESI      | Ion Polarity         | Positive | Set Nebulizer    | 1.5 Bar   |
| Focus       | Active   | Set Capillary        | 4500 V   | Set Dry Heater   | 180 °C    |
| Scan Begin  | 50 m/z   | Set End Plate Offset | -500 V   | Set Dry Gas      | 6.0 l/min |
| Scan End    | 3000 m/z |                      |          | Set Divert Valve | Waste     |



| Meas. m/z | # | Formula                                                                      | m/z      | err [ppm] | Mean err [ppm] | rdb  | N-Rule | e <sup>-</sup> Conf | mSigma | Std I  | Std Mean m/z | VarNorm | Std I m/z | Std m/z Diff | Std Comb Dev |
|-----------|---|------------------------------------------------------------------------------|----------|-----------|----------------|------|--------|---------------------|--------|--------|--------------|---------|-----------|--------------|--------------|
| 519.3360  | 1 | C <sub>33</sub> H <sub>44</sub> F <sub>2</sub> N <sub>2</sub> O <sub>2</sub> | 519.3381 | 4.1       | 5.1            | 12.5 | ok     | even                | 24.77  | 0.0395 | 0.0028       | 0.0124  | 0.0019    | 0.7616       |              |

Bruker Compass DataAnalysis 4.0

printed: 5 5/5/2015 4:31:18 PM

Page 1 of 1

Fig S17: HRMS of compound **30**



Fig S18: <sup>1</sup>H NMR of compound **31** (in the solvent of DMSO-d<sub>6</sub>, 400MHz)



Fig S19:  $^{13}\text{C}$  NMR of compound **31** (in the solvent of  $\text{CDCl}_3/\text{CD}_3\text{OD}=2/1$ , v/v, 101MHz)



Fig S20:  $^1\text{H}$  NMR of compound **32** (in the solvent of  $\text{DMSO-d}_6$ , 400MHz)



Fig S21:  $^{13}\text{C}$  NMR of compound **32** (in the solvent of  $\text{CDCl}_3/\text{CD}_3\text{OD}=2/1$ , v/v, 101MHz)



Fig S22:  $^1\text{H}$  NMR of compound **33** (in the solvent of  $\text{DMSO-d}_6$ , 400MHz)



Fig S23: <sup>13</sup>C NMR of compound 33 (in the solvent of CDCl<sub>3</sub>/CD<sub>3</sub>OD=2/1, v/v, 101MHz)



Fig S24: <sup>1</sup>H NMR of compound 34 (in the solvent of DMSO-d<sub>6</sub>, 400MHz)



Fig S25:  $^{13}\text{C}$  NMR of compound **34** (in the solvent of  $\text{CDCl}_3/\text{CD}_3\text{OD}=2/1$ , v/v, 101MHz)



Fig S26: HRMS of compound **34**



Fig S27: <sup>1</sup>H NMR of compound **35** (in the solvent of DMSO-d<sub>6</sub>, 400MHz)



Fig S28: <sup>13</sup>C NMR of compound **35** (in the solvent of CDCl<sub>3</sub>/CD<sub>3</sub>OD=2/1, v/v, 101MHz)



Fig S29: <sup>1</sup>H NMR of compound **36** (in the solvent of DMSO-d<sub>6</sub>, 400MHz)



Fig S30: <sup>13</sup>C NMR of compound **36** (in the solvent of CDCl<sub>3</sub>/CD<sub>3</sub>OD=2/1, v/v, 101MHz)



Fig S31: <sup>1</sup>H NMR of compound 37 (in the solvent of DMSO-d<sub>6</sub>, 400MHz)



Fig S32: <sup>13</sup>C NMR of compound 37 (in the solvent of CDCl<sub>3</sub>/CD<sub>3</sub>OD=2/1, v/v, 101MHz)

## Crystal data for compound **33**



Fig S33: X-ray structure of compound **33**, the crystal data has been deposited in CCDC with number 1401731

Table S1: Crystal data and structure refinement for compound **33**

|                                 |                                                                  |                 |
|---------------------------------|------------------------------------------------------------------|-----------------|
| Identification code             | cd214518                                                         |                 |
| Empirical formula               | C <sub>33</sub> H <sub>45</sub> Cl N <sub>2</sub> O <sub>3</sub> |                 |
| Formula weight                  | 553.16                                                           |                 |
| Temperature                     | 293(2) K                                                         |                 |
| Wavelength                      | 0.71073 Å                                                        |                 |
| Crystal system                  | Monoclinic                                                       |                 |
| Space group                     | P 21                                                             |                 |
| Unit cell dimensions            | a = 12.474(3) Å                                                  | α = 90°         |
|                                 | b = 6.1241(17) Å                                                 | β = 100.744(6)° |
|                                 | c = 19.930(6) Å                                                  | γ = 90°         |
| Volume                          | 1495.8(7) Å <sup>3</sup>                                         |                 |
| Z                               | 2                                                                |                 |
| Density (calculated)            | 1.228 Mg/m <sup>3</sup>                                          |                 |
| Absorption coefficient          | 0.163 mm <sup>-1</sup>                                           |                 |
| F(000)                          | 596                                                              |                 |
| Crystal size                    | 0.176 x 0.101 x 0.065 mm <sup>3</sup>                            |                 |
| Theta range for data collection | 1.788 to 25.486°                                                 |                 |
| Index ranges                    | -15 ≤ h ≤ 9, -7 ≤ k ≤ 7, -23 ≤ l ≤ 24                            |                 |

|                                   |                                             |
|-----------------------------------|---------------------------------------------|
| Reflections collected             | 8648                                        |
| Independent reflections           | 5385 [R(int) = 0.0381]                      |
| Completeness to theta = 25.242°   | 99.9 %                                      |
| Absorption correction             | Semi-empirical from equivalents             |
| Max. and min. transmission        | 0.7457 and 0.5966                           |
| Refinement method                 | Full-matrix least-squares on F <sup>2</sup> |
| Data / restraints / parameters    | 5385 / 61 / 393                             |
| Goodness-of-fit on F <sup>2</sup> | 0.915                                       |
| Final R indices [I>2sigma(I)]     | R1 = 0.0591, wR2 = 0.1311                   |
| R indices (all data)              | R1 = 0.1150, wR2 = 0.1582                   |
| Absolute structure parameter      | 0.15(8)                                     |
| Extinction coefficient            | n/a                                         |
| Largest diff. peak and hole       | 0.287 and -0.140 e.Å <sup>-3</sup>          |

Table S2: Atomic coordinates ( $\times 10^4$ ) and equivalent isotropic displacement parameters ( $\text{\AA}^2 \times 10^3$ ) for compound **33**

U(eq) is defined as one third of the trace of the orthogonalized  $U^{ij}$  tensor

|       | x       | y         | z       | U(eq)  |
|-------|---------|-----------|---------|--------|
| Cl(1) | 9624(1) | 9248(4)   | 5681(1) | 108(1) |
| N(1)  | 7028(3) | 8884(9)   | 3380(2) | 62(1)  |
| N(2)  | 6138(4) | 7577(9)   | 3374(3) | 73(1)  |
| O(3)  | 5103(6) | 2905(16)  | 5597(4) | 209(4) |
| C(1)  | 6853(4) | 6778(9)   | 1668(3) | 59(2)  |
| C(2)  | 6724(4) | 7297(9)   | 2375(3) | 56(2)  |
| C(3)  | 7388(4) | 8735(9)   | 2777(3) | 52(1)  |
| C(4)  | 8362(4) | 9858(9)   | 2573(3) | 54(1)  |
| C(5)  | 8237(3) | 9803(8)   | 1787(3) | 48(1)  |
| C(6)  | 9018(4) | 10657(10) | 1506(3) | 63(2)  |
| C(7)  | 9071(4) | 10820(10) | 770(3)  | 63(2)  |
| C(8)  | 8033(3) | 10045(8)  | 295(3)  | 47(1)  |
| C(9)  | 7525(4) | 8158(8)   | 634(3)  | 49(1)  |
| C(10) | 7227(3) | 8824(9)   | 1320(3) | 45(1)  |
| C(11) | 6592(4) | 7076(9)   | 139(3)  | 56(2)  |
| C(12) | 6871(4) | 6488(9)   | -556(3) | 55(1)  |
| C(13) | 7283(3) | 8462(8)   | -903(3) | 49(1)  |
| C(14) | 8273(3) | 9338(9)   | -387(3) | 48(1)  |

|        |          |           |           |         |
|--------|----------|-----------|-----------|---------|
| C(15)  | 8804(4)  | 10964(10) | -804(3)   | 62(2)   |
| C(16)  | 8609(4)  | 9966(10)  | -1526(3)  | 62(2)   |
| C(17)  | 7838(4)  | 7988(9)   | -1524(3)  | 53(1)   |
| C(18)  | 6313(4)  | 10531(10) | 1234(3)   | 62(2)   |
| C(19)  | 6379(4)  | 10151(9)  | -1081(3)  | 63(2)   |
| C(20)  | 7118(4)  | 7614(10)  | -2230(3)  | 57(1)   |
| C(21)  | 6320(5)  | 5695(12)  | -2241(3)  | 88(2)   |
| C(22)  | 7850(5)  | 7218(12)  | -2761(3)  | 77(2)   |
| C(25)  | 5959(4)  | 6640(10)  | 2768(3)   | 67(2)   |
| C(26)  | 9393(4)  | 8592(13)  | 2904(3)   | 92(2)   |
| C(27)  | 8458(5)  | 12227(10) | 2822(3)   | 78(2)   |
| C(28)  | 7430(4)  | 10070(11) | 3989(3)   | 60(2)   |
| C(29)  | 8239(4)  | 9207(11)  | 4475(3)   | 63(2)   |
| C(30)  | 8593(4)  | 10317(12) | 5070(3)   | 68(2)   |
| C(31)  | 8132(6)  | 12265(14) | 5194(4)   | 86(2)   |
| C(32)  | 7306(6)  | 13104(12) | 4719(4)   | 89(2)   |
| C(33)  | 6939(5)  | 12016(11) | 4113(4)   | 78(2)   |
| O(1)   | 7121(15) | 11100(30) | -3393(7)  | 142(5)  |
| O(2)   | 5954(11) | 9470(30)  | -4246(7)  | 169(4)  |
| C(23)  | 7260(20) | 6920(50)  | -3490(9)  | 149(5)  |
| C(24)  | 6680(30) | 8950(50)  | -3710(16) | 151(5)  |
| O(1')  | 6738(11) | 10140(20) | -3697(8)  | 99(5)   |
| O(2')  | 5900(20) | 7400(50)  | -4386(14) | 184(11) |
| C(23') | 7299(15) | 6960(50)  | -3480(10) | 41(5)   |
| C(24') | 6440(30) | 8100(70)  | -3883(19) | 152(5)  |
| N(1)   | 7028(3)  | 8884(9)   | 3380(2)   | 62(1)   |

Table S3: Bond lengths [ $\text{\AA}$ ] and angles [ $^\circ$ ] for compound **33**

|             |          |            |          |
|-------------|----------|------------|----------|
| Cl(1)-C(30) | 1.727(6) | N(1)-C(3)  | 1.362(6) |
| N(1)-N(2)   | 1.367(6) | N(1)-C(28) | 1.423(7) |
| N(2)-C(25)  | 1.319(7) | O(3)-H(3C) | 0.8287   |
| O(3)-H(3D)  | 0.8233   | C(1)-C(2)  | 1.482(8) |
| C(1)-C(10)  | 1.546(7) | C(1)-H(1A) | 0.9700   |
| C(1)-H(1B)  | 0.9700   | C(2)-C(3)  | 1.363(7) |
| C(2)-C(25)  | 1.400(7) | C(3)-C(4)  | 1.517(7) |
| C(4)-C(27)  | 1.531(8) | C(4)-C(5)  | 1.544(8) |

|              |           |              |           |
|--------------|-----------|--------------|-----------|
| C(4)-C(26)   | 1.541(7)  | C(5)-C(6)    | 1.320(7)  |
| C(5)-C(10)   | 1.542(6)  | C(6)-C(7)    | 1.485(8)  |
| C(6)-H(6)    | 0.9300    | C(7)-C(8)    | 1.530(7)  |
| C(7)-H(7A)   | 0.9700    | C(7)-H(7B)   | 0.9700    |
| C(8)-C(14)   | 1.510(7)  | C(8)-C(9)    | 1.533(7)  |
| C(8)-H(8)    | 0.9800    | C(9)-C(11)   | 1.529(7)  |
| C(9)-C(10)   | 1.537(7)  | C(9)-H(9)    | 0.9800    |
| C(10)-C(18)  | 1.533(7)  | C(11)-C(12)  | 1.532(7)  |
| C(11)-H(11A) | 0.9700    | C(11)-H(11B) | 0.9700    |
| C(12)-C(13)  | 1.529(7)  | C(12)-H(12A) | 0.9700    |
| C(12)-H(12B) | 0.9700    | C(13)-C(19)  | 1.523(7)  |
| C(13)-C(14)  | 1.547(6)  | C(13)-C(17)  | 1.554(7)  |
| C(14)-C(15)  | 1.524(7)  | C(14)-H(14)  | 0.9800    |
| C(15)-C(16)  | 1.541(8)  | C(15)-H(15A) | 0.9700    |
| C(15)-H(15B) | 0.9700    | C(16)-C(17)  | 1.547(7)  |
| C(16)-H(16A) | 0.9700    | C(16)-H(16B) | 0.9700    |
| C(17)-C(20)  | 1.538(7)  | C(17)-H(17)  | 0.9800    |
| C(18)-H(18A) | 0.9600    | C(18)-H(18B) | 0.9600    |
| C(18)-H(18C) | 0.9600    | C(19)-H(19A) | 0.9600    |
| C(19)-H(19B) | 0.9600    | C(19)-H(19C) | 0.9600    |
| C(20)-C(22)  | 1.540(7)  | C(20)-C(21)  | 1.538(8)  |
| C(20)-H(20)  | 0.9800    | C(21)-H(21A) | 0.9600    |
| C(21)-H(21B) | 0.9600    | C(21)-H(21C) | 0.9600    |
| C(22)-C(23') | 1.477(19) | C(22)-C(23)  | 1.513(17) |
| C(22)-H(22A) | 0.9602    | C(22)-H(22B) | 0.9603    |
| C(22)-H(22C) | 0.9601    | C(22)-H(22D) | 0.9315    |
| C(25)-H(25)  | 0.9300    | C(26)-H(26A) | 0.9600    |
| C(26)-H(26B) | 0.9600    | C(26)-H(26C) | 0.9600    |
| C(27)-H(27A) | 0.9600    | C(27)-H(27B) | 0.9600    |

|                  |          |                  |          |
|------------------|----------|------------------|----------|
| C(27)-H(27C)     | 0.9600   | C(28)-C(29)      | 1.368(7) |
| C(28)-C(33)      | 1.383(8) | C(29)-C(30)      | 1.367(8) |
| C(29)-H(29)      | 0.9300   | C(30)-C(31)      | 1.366(9) |
| C(31)-C(32)      | 1.364(9) | C(31)-H(31)      | 0.9300   |
| C(32)-C(33)      | 1.381(9) | C(32)-H(32)      | 0.9300   |
| C(33)-H(33)      | 0.9300   | O(1)-C(24)       | 1.52(3)  |
| O(1)-H(1)        | 0.8200   | O(2)-C(24)       | 1.31(3)  |
| C(23)-C(24)      | 1.46(2)  | C(23)-H(23A)     | 0.9700   |
| C(23)-H(23B)     | 0.9700   | O(1')-C(24')     | 1.33(4)  |
| O(1')-H(1')      | 0.8200   | O(2')-C(24')     | 1.18(4)  |
| C(23')-C(24')    | 1.40(2)  | C(23')-H(23C)    | 0.9700   |
| C(23')-H(23D)    | 0.9700   |                  |          |
| C(3)-N(1)-N(2)   | 110.7(5) | C(3)-N(1)-C(28)  | 131.7(5) |
| N(2)-N(1)-C(28)  | 117.5(5) | C(25)-N(2)-N(1)  | 105.1(5) |
| H(3C)-O(3)-H(3D) | 144.9    | C(2)-C(1)-C(10)  | 110.4(5) |
| C(2)-C(1)-H(1A)  | 109.6    | C(10)-C(1)-H(1A) | 109.6    |
| C(2)-C(1)-H(1B)  | 109.6    | C(10)-C(1)-H(1B) | 109.6    |
| H(1A)-C(1)-H(1B) | 108.1    | C(3)-C(2)-C(25)  | 105.1(5) |
| C(3)-C(2)-C(1)   | 122.4(5) | C(25)-C(2)-C(1)  | 132.5(5) |
| N(1)-C(3)-C(2)   | 107.3(5) | N(1)-C(3)-C(4)   | 128.2(5) |
| C(2)-C(3)-C(4)   | 124.4(5) | C(3)-C(4)-C(27)  | 111.1(5) |
| C(3)-C(4)-C(5)   | 109.1(4) | C(27)-C(4)-C(5)  | 109.6(5) |
| C(3)-C(4)-C(26)  | 107.7(4) | C(27)-C(4)-C(26) | 109.2(5) |
| C(5)-C(4)-C(26)  | 110.0(5) | C(6)-C(5)-C(10)  | 118.8(5) |
| C(6)-C(5)-C(4)   | 118.6(5) | C(10)-C(5)-C(4)  | 122.6(4) |
| C(5)-C(6)-C(7)   | 128.2(5) | C(5)-C(6)-H(6)   | 115.9    |
| C(7)-C(6)-H(6)   | 115.9    | C(6)-C(7)-C(8)   | 113.7(4) |
| C(6)-C(7)-H(7A)  | 108.8    | C(8)-C(7)-H(7A)  | 108.8    |
| C(6)-C(7)-H(7B)  | 108.8    | C(8)-C(7)-H(7B)  | 108.8    |

|                     |          |                    |          |
|---------------------|----------|--------------------|----------|
| H(7A)-C(7)-H(7B)    | 107.7    | C(14)-C(8)-C(7)    | 111.0(4) |
| C(14)-C(8)-C(9)     | 110.4(4) | C(7)-C(8)-C(9)     | 109.5(4) |
| C(14)-C(8)-H(8)     | 108.7    | C(7)-C(8)-H(8)     | 108.7    |
| C(9)-C(8)-H(8)      | 108.7    | C(11)-C(9)-C(8)    | 111.7(4) |
| C(11)-C(9)-C(10)    | 114.0(4) | C(8)-C(9)-C(10)    | 112.3(4) |
| C(11)-C(9)-H(9)     | 106.0    | C(8)-C(9)-H(9)     | 106.0    |
| C(10)-C(9)-H(9)     | 106.0    | C(18)-C(10)-C(9)   | 112.3(4) |
| C(18)-C(10)-C(5)    | 108.0(4) | C(9)-C(10)-C(5)    | 109.6(4) |
| C(18)-C(10)-C(1)    | 108.8(4) | C(9)-C(10)-C(1)    | 109.1(4) |
| C(5)-C(10)-C(1)     | 108.9(4) | C(9)-C(11)-C(12)   | 114.3(4) |
| C(9)-C(11)-H(11A)   | 108.7    | C(12)-C(11)-H(11A) | 108.7    |
| C(9)-C(11)-H(11B)   | 108.7    | C(12)-C(11)-H(11B) | 108.7    |
| H(11A)-C(11)-H(11B) | 107.6    | C(13)-C(12)-C(11)  | 112.1(4) |
| C(13)-C(12)-H(12A)  | 109.2    | C(11)-C(12)-H(12A) | 109.2    |
| C(13)-C(12)-H(12B)  | 109.2    | C(11)-C(12)-H(12B) | 109.2    |
| H(12A)-C(12)-H(12B) | 107.9    | C(19)-C(13)-C(12)  | 110.2(4) |
| C(19)-C(13)-C(14)   | 112.6(4) | C(12)-C(13)-C(14)  | 105.5(4) |
| C(19)-C(13)-C(17)   | 111.2(4) | C(12)-C(13)-C(17)  | 116.8(4) |
| C(14)-C(13)-C(17)   | 100.1(4) | C(8)-C(14)-C(15)   | 118.8(4) |
| C(8)-C(14)-C(13)    | 115.4(4) | C(15)-C(14)-C(13)  | 103.8(4) |
| C(8)-C(14)-H(14)    | 105.9    | C(15)-C(14)-H(14)  | 105.9    |
| C(13)-C(14)-H(14)   | 105.9    | C(14)-C(15)-C(16)  | 103.9(5) |
| C(14)-C(15)-H(15A)  | 111.0    | C(16)-C(15)-H(15A) | 111.0    |
| C(14)-C(15)-H(15B)  | 111.0    | C(16)-C(15)-H(15B) | 111.0    |
| H(15A)-C(15)-H(15B) | 109.0    | C(15)-C(16)-C(17)  | 107.4(4) |
| C(15)-C(16)-H(16A)  | 110.2    | C(17)-C(16)-H(16A) | 110.2    |
| C(15)-C(16)-H(16B)  | 110.2    | C(17)-C(16)-H(16B) | 110.2    |
| H(16A)-C(16)-H(16B) | 108.5    | C(20)-C(17)-C(16)  | 111.8(4) |
| C(20)-C(17)-C(13)   | 119.1(4) | C(16)-C(17)-C(13)  | 103.0(4) |

|                     |           |                     |          |
|---------------------|-----------|---------------------|----------|
| C(20)-C(17)-H(17)   | 107.5     | C(16)-C(17)-H(17)   | 107.5    |
| C(13)-C(17)-H(17)   | 107.5     | C(10)-C(18)-H(18A)  | 109.5    |
| C(10)-C(18)-H(18B)  | 109.5     | H(18A)-C(18)-H(18B) | 109.5    |
| C(10)-C(18)-H(18C)  | 109.5     | H(18A)-C(18)-H(18C) | 109.5    |
| H(18B)-C(18)-H(18C) | 109.5     | C(13)-C(19)-H(19A)  | 109.5    |
| C(13)-C(19)-H(19B)  | 109.5     | H(19A)-C(19)-H(19B) | 109.5    |
| C(13)-C(19)-H(19C)  | 109.5     | H(19A)-C(19)-H(19C) | 109.5    |
| H(19B)-C(19)-H(19C) | 109.5     | C(17)-C(20)-C(22)   | 109.4(4) |
| C(17)-C(20)-C(21)   | 113.2(5)  | C(22)-C(20)-C(21)   | 109.5(5) |
| C(17)-C(20)-H(20)   | 108.2     | C(22)-C(20)-H(20)   | 108.2    |
| C(21)-C(20)-H(20)   | 108.2     | C(20)-C(21)-H(21A)  | 109.5    |
| C(20)-C(21)-H(21B)  | 109.5     | H(21A)-C(21)-H(21B) | 109.5    |
| C(20)-C(21)-H(21C)  | 109.5     | H(21A)-C(21)-H(21C) | 109.5    |
| H(21B)-C(21)-H(21C) | 109.5     | C(23')-C(22)-C(20)  | 117.1(9) |
| C(23)-C(22)-C(20)   | 115.7(10) | C(23)-C(22)-H(22A)  | 110.8    |
| C(20)-C(22)-H(22A)  | 108.2     | C(23)-C(22)-H(22B)  | 105.1    |
| C(20)-C(22)-H(22B)  | 108.0     | H(22A)-C(22)-H(22B) | 108.7    |
| C(23')-C(22)-H(22C) | 100.1     | C(20)-C(22)-H(22C)  | 107.3    |
| C(23')-C(22)-H(22D) | 117.1     | C(20)-C(22)-H(22D)  | 104.9    |
| H(22C)-C(22)-H(22D) | 109.8     | N(2)-C(25)-C(2)     | 111.8(5) |
| N(2)-C(25)-H(25)    | 124.1     | C(2)-C(25)-H(25)    | 124.1    |
| C(4)-C(26)-H(26A)   | 109.5     | C(4)-C(26)-H(26B)   | 109.5    |
| H(26A)-C(26)-H(26B) | 109.5     | C(4)-C(26)-H(26C)   | 109.5    |
| H(26A)-C(26)-H(26C) | 109.5     | H(26B)-C(26)-H(26C) | 109.5    |
| C(4)-C(27)-H(27A)   | 109.5     | C(4)-C(27)-H(27B)   | 109.5    |
| H(27A)-C(27)-H(27B) | 109.5     | C(4)-C(27)-H(27C)   | 109.5    |
| H(27A)-C(27)-H(27C) | 109.5     | H(27B)-C(27)-H(27C) | 109.5    |
| C(29)-C(28)-C(33)   | 119.9(6)  | C(29)-C(28)-N(1)    | 120.2(6) |
| C(33)-C(28)-N(1)    | 119.7(5)  | C(30)-C(29)-C(28)   | 119.9(6) |

|                      |          |                     |          |
|----------------------|----------|---------------------|----------|
| C(30)-C(29)-H(29)    | 120.0    | C(28)-C(29)-H(29)   | 120.0    |
| C(29)-C(30)-C(31)    | 120.8(6) | C(29)-C(30)-Cl(1)   | 120.1(5) |
| C(31)-C(30)-Cl(1)    | 119.1(6) | C(32)-C(31)-C(30)   | 119.5(7) |
| C(32)-C(31)-H(31)    | 120.2    | C(30)-C(31)-H(31)   | 120.2    |
| C(31)-C(32)-C(33)    | 120.6(7) | C(31)-C(32)-H(32)   | 119.7    |
| C(33)-C(32)-H(32)    | 119.7    | C(32)-C(33)-C(28)   | 119.1(6) |
| C(32)-C(33)-H(33)    | 120.4    | C(28)-C(33)-H(33)   | 120.4    |
| C(24)-O(1)-H(1)      | 109.4    | C(24)-C(23)-C(22)   | 108(2)   |
| C(24)-C(23)-H(23A)   | 106.9    | C(22)-C(23)-H(23A)  | 112.2    |
| C(24)-C(23)-H(23B)   | 110.7    | C(22)-C(23)-H(23B)  | 110.9    |
| H(23A)-C(23)-H(23B)  | 107.9    | O(2)-C(24)-C(23)    | 133(3)   |
| O(2)-C(24)-O(1)      | 106(2)   | C(23)-C(24)-O(1)    | 120(2)   |
| C(24')-O(1')-H(1')   | 109.5    | C(24')-C(23')-C(22) | 132(2)   |
| C(24')-C(23')-H(23C) | 101.3    | C(22)-C(23')-H(23C) | 101.4    |
| C(24')-C(23')-H(23D) | 108.5    | C(22)-C(23')-H(23D) | 104.2    |
| H(23C)-C(23')-H(23D) | 107.2    | O(2')-C(24')-O(1')  | 131(3)   |
| O(2')-C(24')-C(23')  | 124(4)   | O(1')-C(24')-C(23') | 100(3)   |

Table S4: Torsion angles [°] for compound **33**

|                      |           |                       |           |
|----------------------|-----------|-----------------------|-----------|
| C(3)-N(1)-N(2)-C(25) | -0.1(6)   | C(28)-N(1)-N(2)-C(25) | -178.3(5) |
| C(10)-C(1)-C(2)-C(3) | -35.1(7)  | C(10)-C(1)-C(2)-C(25) | 141.7(6)  |
| N(2)-N(1)-C(3)-C(2)  | -0.4(6)   | C(28)-N(1)-C(3)-C(2)  | 177.6(6)  |
| N(2)-N(1)-C(3)-C(4)  | -178.4(5) | C(28)-N(1)-C(3)-C(4)  | -0.4(10)  |
| C(25)-C(2)-C(3)-N(1) | 0.6(6)    | C(1)-C(2)-C(3)-N(1)   | 178.1(5)  |
| C(25)-C(2)-C(3)-C(4) | 178.7(5)  | C(1)-C(2)-C(3)-C(4)   | -3.7(8)   |
| N(1)-C(3)-C(4)-C(27) | -40.9(7)  | C(2)-C(3)-C(4)-C(27)  | 141.4(5)  |
| N(1)-C(3)-C(4)-C(5)  | -161.9(5) | C(2)-C(3)-C(4)-C(5)   | 20.4(7)   |
| N(1)-C(3)-C(4)-C(26) | 78.7(7)   | C(2)-C(3)-C(4)-C(26)  | -99.0(6)  |
| C(3)-C(4)-C(5)-C(6)  | -178.4(5) | C(27)-C(4)-C(5)-C(6)  | 59.6(7)   |

|                         |           |                         |           |
|-------------------------|-----------|-------------------------|-----------|
| C(26)-C(4)-C(5)-C(6)    | -60.5(7)  | C(3)-C(4)-C(5)-C(10)    | 2.6(7)    |
| C(27)-C(4)-C(5)-C(10)   | -119.4(5) | C(26)-C(4)-C(5)-C(10)   | 120.5(5)  |
| C(10)-C(5)-C(6)-C(7)    | -0.1(9)   | C(4)-C(5)-C(6)-C(7)     | -179.1(5) |
| C(5)-C(6)-C(7)-C(8)     | 5.2(9)    | C(6)-C(7)-C(8)-C(14)    | -155.9(5) |
| C(6)-C(7)-C(8)-C(9)     | -33.8(6)  | C(14)-C(8)-C(9)-C(11)   | -48.3(5)  |
| C(7)-C(8)-C(9)-C(11)    | -170.8(4) | C(14)-C(8)-C(9)-C(10)   | -178.0(3) |
| C(7)-C(8)-C(9)-C(10)    | 59.6(5)   | C(11)-C(9)-C(10)-C(18)  | -62.4(6)  |
| C(8)-C(9)-C(10)-C(18)   | 66.0(5)   | C(11)-C(9)-C(10)-C(5)   | 177.6(4)  |
| C(8)-C(9)-C(10)-C(5)    | -54.0(5)  | C(11)-C(9)-C(10)-C(1)   | 58.4(5)   |
| C(8)-C(9)-C(10)-C(1)    | -173.2(4) | C(6)-C(5)-C(10)-C(18)   | -98.7(6)  |
| C(4)-C(5)-C(10)-C(18)   | 80.3(6)   | C(6)-C(5)-C(10)-C(9)    | 23.9(6)   |
| C(4)-C(5)-C(10)-C(9)    | -157.1(4) | C(6)-C(5)-C(10)-C(1)    | 143.3(5)  |
| C(4)-C(5)-C(10)-C(1)    | -37.8(6)  | C(2)-C(1)-C(10)-C(18)   | -65.8(6)  |
| C(2)-C(1)-C(10)-C(9)    | 171.3(4)  | C(2)-C(1)-C(10)-C(5)    | 51.7(5)   |
| C(8)-C(9)-C(11)-C(12)   | 49.1(6)   | C(10)-C(9)-C(11)-C(12)  | 177.8(4)  |
| C(9)-C(11)-C(12)-C(13)  | -55.0(6)  | C(11)-C(12)-C(13)-C(19) | -65.4(6)  |
| C(11)-C(12)-C(13)-C(14) | 56.4(5)   | C(11)-C(12)-C(13)-C(17) | 166.5(4)  |
| C(7)-C(8)-C(14)-C(15)   | -57.2(6)  | C(9)-C(8)-C(14)-C(15)   | -178.8(4) |
| C(7)-C(8)-C(14)-C(13)   | 178.5(5)  | C(9)-C(8)-C(14)-C(13)   | 56.9(5)   |
| C(19)-C(13)-C(14)-C(8)  | 60.4(6)   | C(12)-C(13)-C(14)-C(8)  | -59.9(5)  |
| C(17)-C(13)-C(14)-C(8)  | 178.5(4)  | C(19)-C(13)-C(14)-C(15) | -71.5(5)  |
| C(12)-C(13)-C(14)-C(15) | 168.2(4)  | C(17)-C(13)-C(14)-C(15) | 46.6(5)   |
| C(8)-C(14)-C(15)-C(16)  | -163.7(4) | C(13)-C(14)-C(15)-C(16) | -33.9(5)  |
| C(14)-C(15)-C(16)-C(17) | 7.8(5)    | C(15)-C(16)-C(17)-C(20) | 149.9(4)  |
| C(15)-C(16)-C(17)-C(13) | 20.8(5)   | C(19)-C(13)-C(17)-C(20) | -45.8(6)  |
| C(12)-C(13)-C(17)-C(20) | 81.8(6)   | C(14)-C(13)-C(17)-C(20) | -165.0(5) |
| C(19)-C(13)-C(17)-C(16) | 78.6(5)   | C(12)-C(13)-C(17)-C(16) | -153.8(4) |
| C(14)-C(13)-C(17)-C(16) | -40.6(5)  | C(16)-C(17)-C(20)-C(22) | 59.1(6)   |
| C(13)-C(17)-C(20)-C(22) | 179.0(5)  | C(16)-C(17)-C(20)-C(21) | -178.5(4) |

|                           |          |                           |            |
|---------------------------|----------|---------------------------|------------|
| C(13)-C(17)-C(20)-C(21)   | -58.5(7) | C(17)-C(20)-C(22)-C(23')  | -176.4(14) |
| C(21)-C(20)-C(22)-C(23')  | 59.0(15) | C(17)-C(20)-C(22)-C(23)   | -177.3(14) |
| C(21)-C(20)-C(22)-C(23)   | 58.1(14) | N(1)-N(2)-C(25)-C(2)      | 0.5(7)     |
| C(3)-C(2)-C(25)-N(2)      | -0.7(7)  | C(1)-C(2)-C(25)-N(2)      | -177.9(6)  |
| C(3)-N(1)-C(28)-C(29)     | -85.0(8) | N(2)-N(1)-C(28)-C(29)     | 92.9(6)    |
| C(3)-N(1)-C(28)-C(33)     | 100.3(7) | N(2)-N(1)-C(28)-C(33)     | -81.9(7)   |
| C(33)-C(28)-C(29)-C(30)   | -2.8(9)  | N(1)-C(28)-C(29)-C(30)    | -177.5(5)  |
| C(28)-C(29)-C(30)-C(31)   | 1.4(9)   | C(28)-C(29)-C(30)-Cl(1)   | -179.3(4)  |
| C(29)-C(30)-C(31)-C(32)   | 0.3(10)  | Cl(1)-C(30)-C(31)-C(32)   | -179.0(5)  |
| C(30)-C(31)-C(32)-C(33)   | -0.6(11) | C(31)-C(32)-C(33)-C(28)   | -0.8(11)   |
| C(29)-C(28)-C(33)-C(32)   | 2.5(9)   | N(1)-C(28)-C(33)-C(32)    | 177.3(6)   |
| C(23')-C(22)-C(23)-C(24)  | -89(70)  | C(20)-C(22)-C(23)-C(24)   | 64(3)      |
| C(22)-C(23)-C(24)-O(2)    | -169(3)  | C(22)-C(23)-C(24)-O(1)    | 28(4)      |
| C(23)-C(22)-C(23')-C(24') | 72(68)   | C(20)-C(22)-C(23')-C(24') | 44(4)      |
| C(22)-C(23')-C(24')-O(2') | -159(4)  | C(22)-C(23')-C(24')-O(1') | 43(4)      |
